## Erratum

**Genetic interactions between Cdk1-CyclinB and the Separase complex in *Drosophila***

Jun-Yuan Ji, Justin Crest and Gerold Schubiger *Development* **132**, 1875-1884.

Two errors on p. 1876 were not corrected before going to press.

The last paragraph of the Introduction should start, ‘The investigations of the Pim-Thr-Sse complex...’.

In the Materials and methods, under the sub-heading ‘Stocks’, the last mention of *histone-GFP* should read ‘*histone-GFP/+*’.

We apologise to the authors and readers for these mistakes.
